# Supplementary material
Source: PubMed Central journal article supplement (PMC3461923)
Supplement: JCI64151sd.pdf [file JCI64151sd.pdf]

**Table 1) Global miRNA profiling of pancreatic islets of pregnant rats at day 14 of gestation**

We compared by microarray analysis the expression of 350 miRNAs in pancreatic islets of four pregnant rats (at day 14 of gestation) with four age-matched female control rats. The table shows the miRNAs displaying significant expression changes ( $p < 0.05$ ) between the two groups. The data are given in a  $\text{Log}_2$  scale and are the mean  $\pm$  SD of four individual rats.

| Microarray                    | Systematic Name | Control rats ( $\text{Log}_2$ scale) | Pregnant rats ( $\text{Log}_2$ scale) | Fold change | Expression change | p-values |
|-------------------------------|-----------------|--------------------------------------|---------------------------------------|-------------|-------------------|----------|
| Pregnant rats vs control rats | rno-miR-144     | 4.81 $\pm$ 0.89                      | 6.73 $\pm$ 0.62                       | 3.77        | up                | 0.0124   |
|                               | rno-miR-188     | 6.46 $\pm$ 0.93                      | 5.11 $\pm$ 0.56                       | 2.56        | down              | 0.0469   |
|                               | rno-miR-218     | 4.99 $\pm$ 0.28                      | 3.34 $\pm$ 0.29                       | 3.14        | down              | 0.00017  |
|                               | rno-miR-325-5p  | 1.83 $\pm$ 0.88                      | 3.34 $\pm$ 0.29                       | 2.86        | up                | 0.0143   |
|                               | rno-miR-338-3p  | 7.70 $\pm$ 0.24                      | 6.67 $\pm$ 0.20                       | 2.04        | down              | 0.00057  |
|                               | rno-miR-451     | 8.52 $\pm$ 0.64                      | 9.77 $\pm$ 0.60                       | 2.38        | up                | 0.0286   |
|                               | rno-miR-874     | 3.21 $\pm$ 1.31                      | 0.52 $\pm$ 0.93                       | 6.46        | down              | 0.0155   |

**Table 2) Impact of miR-338-3p inhibition and of different hormonal treatments on human  $\beta$ -cell proliferation.** Dissociated human islet cells were transfected with a scrambled anti-miR or with anti-miR-338-3p. 48h treatments with prolactin (500ng/ml), estradiol (100nM), G1 (100nM), Exendin-4 (100nM) were used as controls for  $\beta$ -cell proliferation. The results are the mean  $\pm$  SD of 3 independent experiments.

|                          | Anti-control   | Anti-338-3p    | Prolactin      | Estradiol      | G1             | Exendin-4      |
|--------------------------|----------------|----------------|----------------|----------------|----------------|----------------|
| Ki67 <sup>+</sup> cells  | 0              | 0              | 0              | 0              | 0              | 0              |
| Ins <sup>+</sup> cells   | 715            | 683            | 409            | 500            | 391            | 432            |
| Total cells              | 1241           | 1103           | 706            | 826            | 678            | 794            |
| % Ins <sup>+</sup> cells | 57.6 $\pm$ 6.7 | 61.9 $\pm$ 9.7 | 57.9 $\pm$ 9.8 | 60.5 $\pm$ 4.8 | 57.7 $\pm$ 6.1 | 54.4 $\pm$ 2.9 |

**Table 3) List of gene ontology functions significantly enriched upon miR-338-3p down-regulation**

The genes involved in cell cycle and cell growth are highlighted in green.

|                                         | No. of genes | Benjamini <i>P</i> value |                                                         | No. of genes | Benjamini <i>P</i> value |
|-----------------------------------------|--------------|--------------------------|---------------------------------------------------------|--------------|--------------------------|
| cellular process                        | 284          | 1.49E-04                 | nucleobase, nucleoside and nucleotide metabolic process | 25           | 0.00985475               |
| plasma membrane                         | 105          | 0.03420889               | response to hormone stimulus                            | 40           | 1.52E-04                 |
| multicellular organismal development    | 102          | 0.02322373               | cell cycle                                              | 37           | 1.31E-04                 |
| system development                      | 90           | 0.03954513               | response to peptide hormone stimulus                    | 18           | 0.03782789               |
| nervous system development              | 51           | 0.02848449               | synaptic transmission                                   | 18           | 0.03344988               |
| cytoskeletal part                       | 39           | 0.03434116               | response to steroid hormone stimulus                    | 24           | 0.0057367                |
| cytoskeleton                            | 53           | 0.00740984               | alcohol metabolic process                               | 33           | 2.15E-04                 |
| response to external stimulus           | 44           | 0.03155333               | response to organic cyclic substance                    | 18           | 0.02697827               |
| response to organic substance           | 51           | 0.01025913               | cell cycle process                                      | 31           | 2.14E-04                 |
| cell projection                         | 42           | 0.01987947               | Golgi membrane                                          | 14           | 0.03482567               |
| endomembrane system                     | 37           | 0.03217145               | regulation of cell growth                               | 15           | 0.04781072               |
| endoplasmic reticulum                   | 46           | 0.00897908               | axon                                                    | 19           | 0.01351035               |
| cellular ketone metabolic process       | 32           | 0.04672126               | mitotic cell cycle                                      | 23           | 4.12E-04                 |
| organic acid metabolic process          | 32           | 0.03866164               | cellular response to hormone stimulus                   | 15           | 0.01341517               |
| carboxylic acid metabolic process       | 32           | 0.03794723               | response to corticosteroid stimulus                     | 14           | 0.02145489               |
| oxoacid metabolic process               | 32           | 0.03794723               | cell cycle phase                                        | 25           | 1.29E-04                 |
| neuron projection                       | 31           | 0.01076592               | cell division                                           | 16           | 0.00722932               |
| cellular carbohydrate metabolic process | 24           | 0.03422616               | regeneration                                            | 13           | 0.02535536               |
| regulation of growth                    | 22           | 0.03075852               | response to glucocorticoid stimulus                     | 14           | 0.0128922                |
| microtubule cytoskeleton                | 29           | 0.01197663               | spindle                                                 | 11           | 0.03353471               |
| response to endogenous stimulus         | 43           | 1.19E-04                 | M phase                                                 | 20           | 4.41E-04                 |
| nucleotide metabolic process            | 22           | 0.02641974               | axon part                                               | 10           | 0.03259455               |
| nucleoside phosphate metabolic process  | 22           | 0.02641974               | condensed chromosome                                    | 12           | 0.01229556               |
| organelle fission                       | 15           | 9.70E-04                 | liver development                                       | 11           | 0.00738015               |
| mitosis                                 | 15           | 5.22E-04                 | steroid biosynthetic process                            | 12           | 0.00271587               |
| nuclear division                        | 15           | 5.22E-04                 | condensed chromosome, centromeric region                | 7            | 0.03261501               |
| M phase of mitotic cell cycle           | 16           | 2.24E-04                 | pyruvate metabolic process                              | 8            | 0.03004931               |
| cholesterol metabolic process           | 11           | 0.00896151               | sterol biosynthetic process                             | 11           | 3.23E-05                 |
| sterol metabolic process                | 12           | 0.00423696               | cholesterol biosynthetic process                        | 10           | 4.06E-05                 |
| organ regeneration                      | 9            | 0.03075862               | Steroid biosynthesis                                    | 8            | 7.79E-05                 |

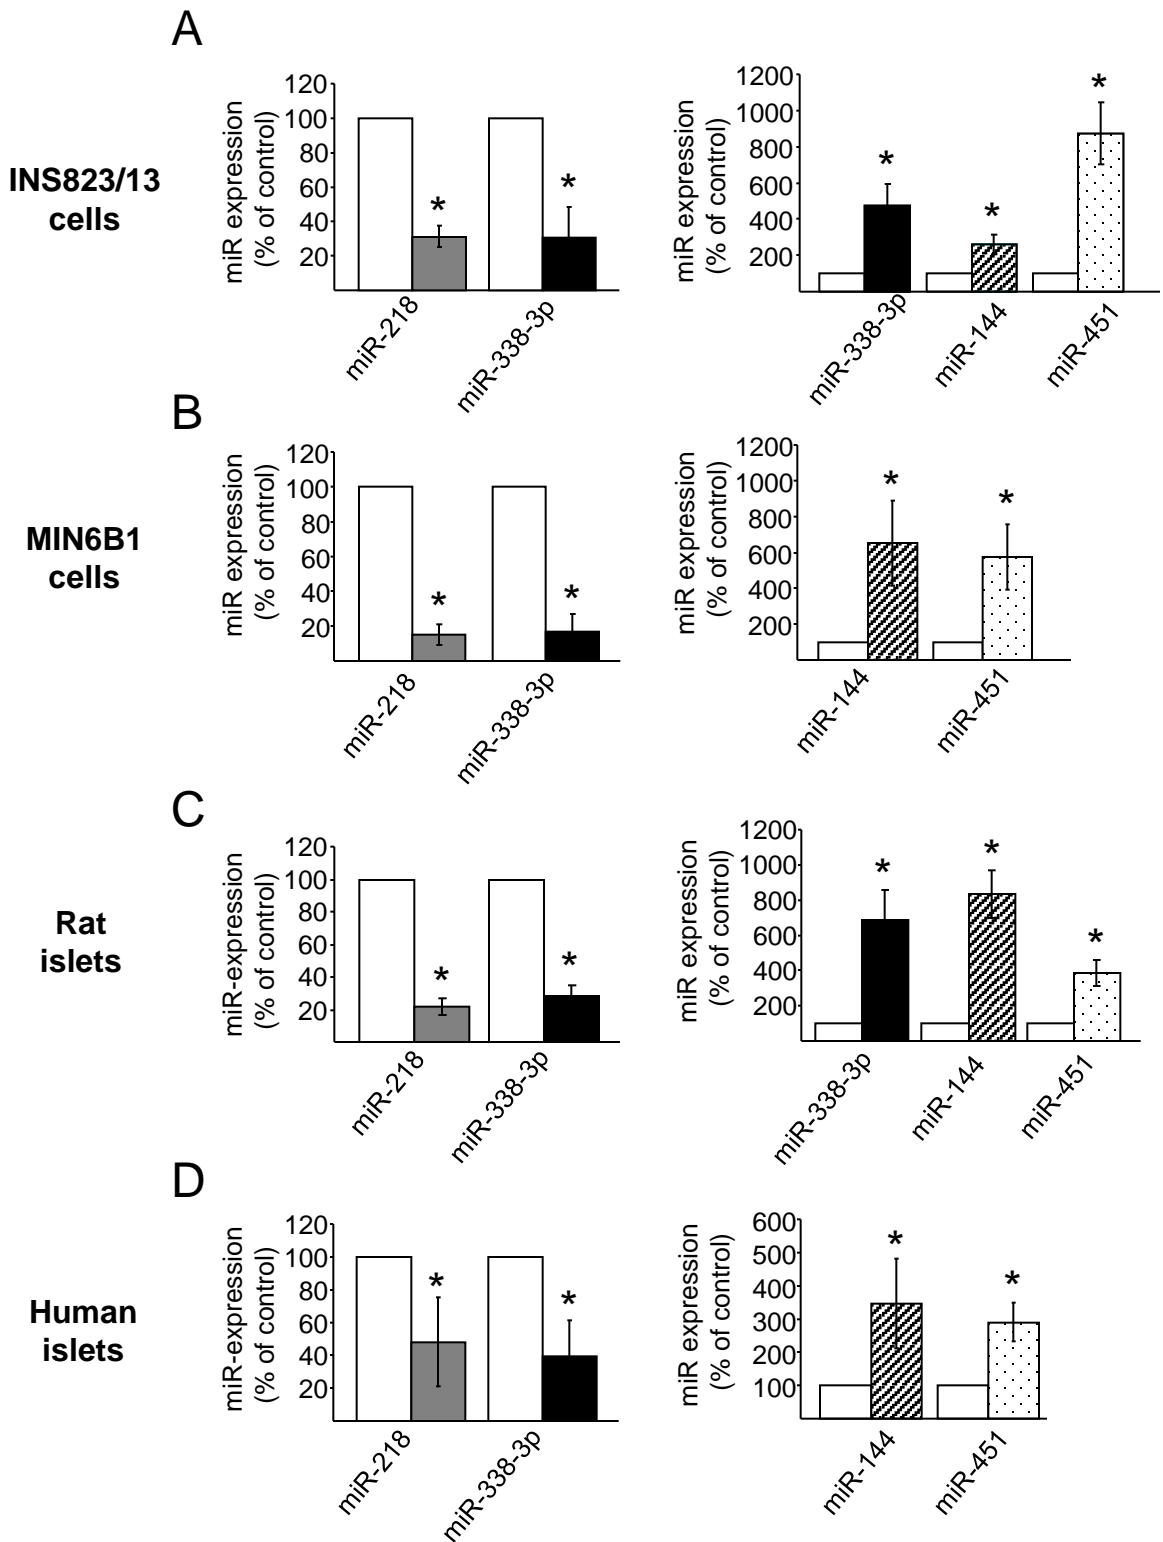

**Supplementary Fig.1) Down- and up-regulation of miRNAs in cell lines and dispersed rat and human islet cells.** INS832/13 cells (A), MIN6B1 cells (B), dissociated rat (C) and human islets (D) were transfected with either single stranded antisense oligonucleotides to reduce (left panels) or with oligonucleotide mimic to increase (right panels) the expression of the indicated miRNAs. A scrambled anti-miR sequence and a siRNA duplex against GFP were used as controls for the experiments on the left and on the right, respectively. The miRNA levels were measured 48h later by qRT-PCR. The results are the mean  $\pm$  SD of 4 (INS832/13 and MIN6B1 cells) or 3 (rat and human islets) independent experiments. Statistical differences were determined by ANOVA (\*  $p < 0.05$ ).

## Rat islets

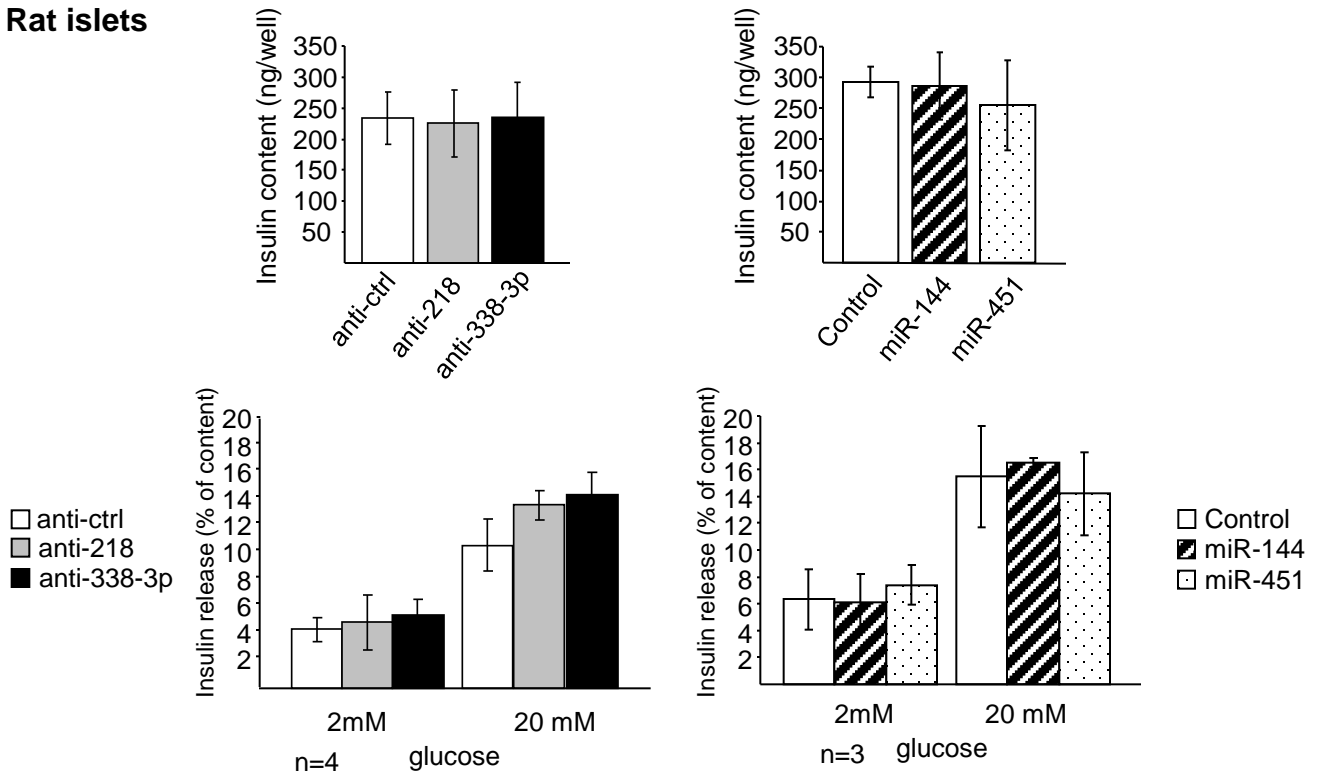

## MIN6B1 cells

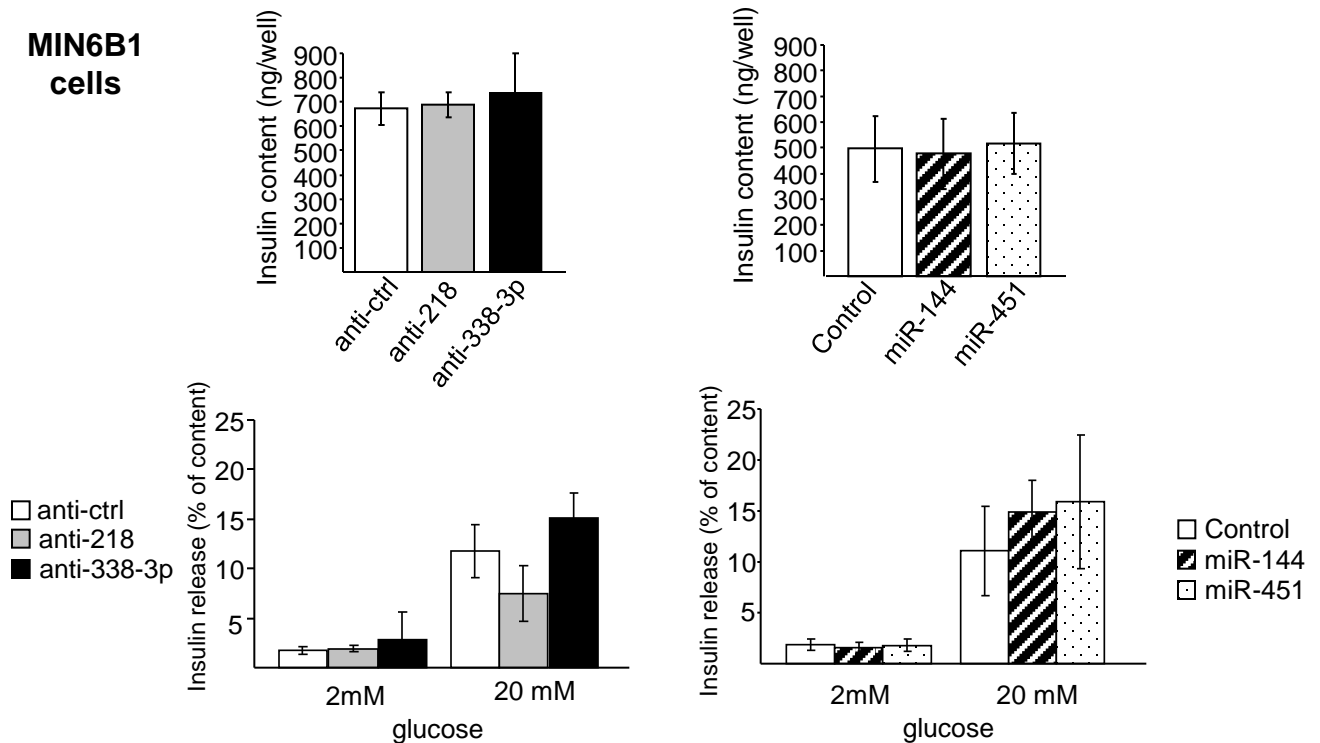

### Supplementary Fig.2) Changes in miRNA expression mimicking those occurring during pregnancy do not impair glucose-induced insulin secretion.

Dissociated rat islet cells (upper panels) or MIN6B1 cells (lower panels) were transfected with the indicated anti-miRs (left panels) or with miRNA mimics (right panels). Two days later the cells were incubated at 2 or 20 mM glucose for 45 minutes. Insulin content and insulin secretion were measured by ELISA. The results are the mean  $\pm$  SD of 4 independent experiments. \* Significantly different from control condition ( $p < 0.05$  by ANOVA analysis).

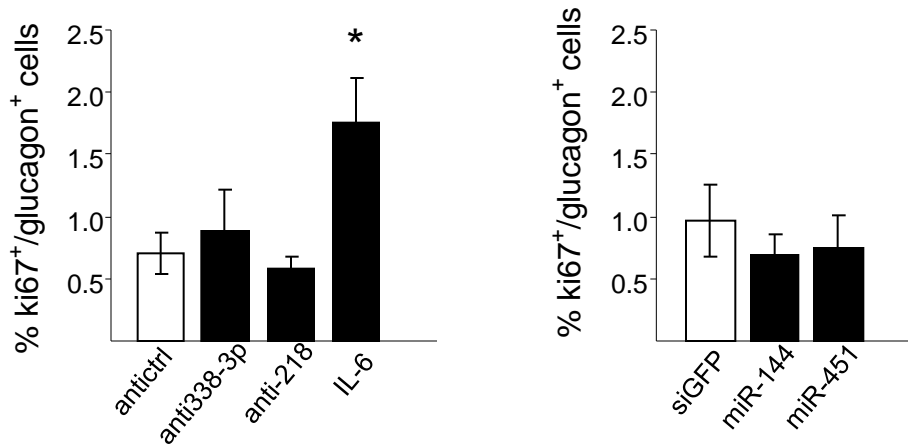

**Supplementary Fig.3) Impact of modifications in miRNA levels on  $\alpha$ -cell proliferation.**

Dissociated rat islet cells were transfected with the indicated anti-miR (left panels) or with oligonucleotide mimics (right panels) to modulate the expression of the indicated miRNAs. IL-6 treatment (100ng/ml for 48h) was used as positive control for  $\alpha$ -cell proliferation. The fraction of proliferating glucagon-positive cells was assessed using a Ki67 antibody. The data are the mean  $\pm$  SD of 5 independent experiments. \* Significantly different from control condition ( $p < 0.05$  by ANOVA analysis).

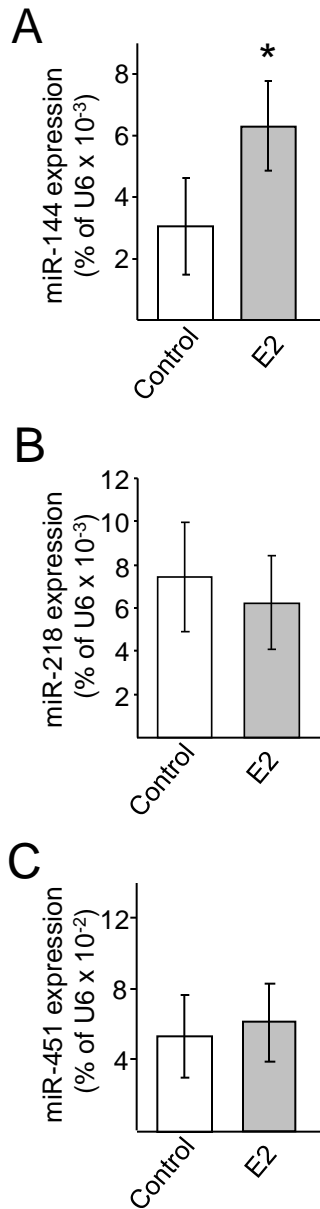

**Supplementary Fig.4) miRNAs expression in rat islets after exposure to estradiol.**

Rat pancreatic islets were incubated in the absence (Control) or in the presence of 100 nM estradiol (E2) for 48h. The expressions of miR-144 (A), miR-218 (B) and miR-451 (C) were measured by qRT-PCR and are expressed as % of U6. The values correspond to the mean  $\pm$  SD of 4 independent experiments. \* Significantly different from control condition ( $p < 0.05$  by ANOVA analysis).

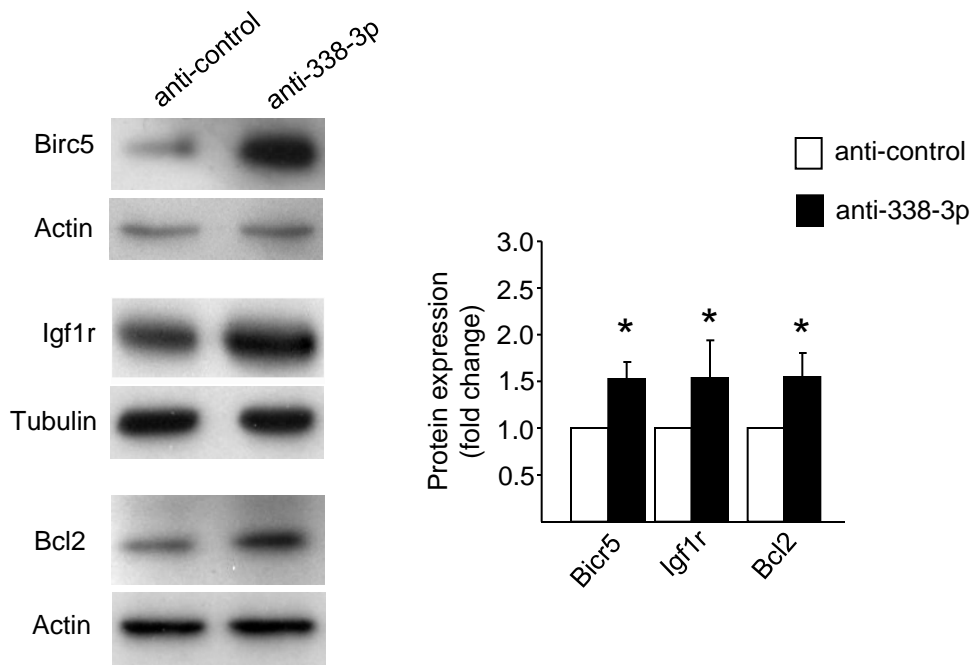

**Supplementary Fig.5) Changes in protein expression induced by miR-338-3p down-regulation.**

INS832/13 cells were transfected with a scrambled anti-miR or with anti-miR-338-3p. Two days later the cells were collected and the expression of Birc5, Igf1r and Bcl2 proteins analyzed by Western Blotting. Examples of blots are shown on the left. Quantification of the bands is given on the right. The results are expressed as fold changes and correspond to the mean  $\pm$  SD of 4, 5 and 6 independent experiments for Birc5, Igf1r and Bcl2, respectively. \* Significantly different from control condition ( $p < 0.05$  by ANOVA analysis).



**A**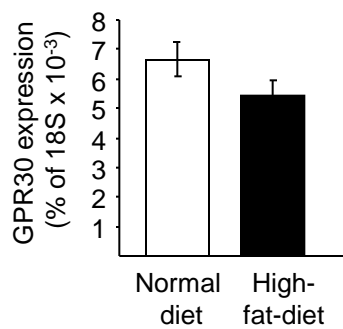**B**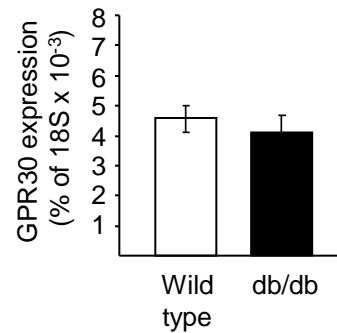

**Supplementary Fig.6) GPR30 expression is not changed in islets from mice fed a high fat diet and from *db/db* mice.** GPR30 levels were measured by qRT-PCR in islets from mice fed a high-fat-diet for 8 weeks (A) and in 6 week-old normoglycemic *db/db* mice (B). The data are expressed as % of 18S. They are the means  $\pm$  SD of 3 different mice per group.

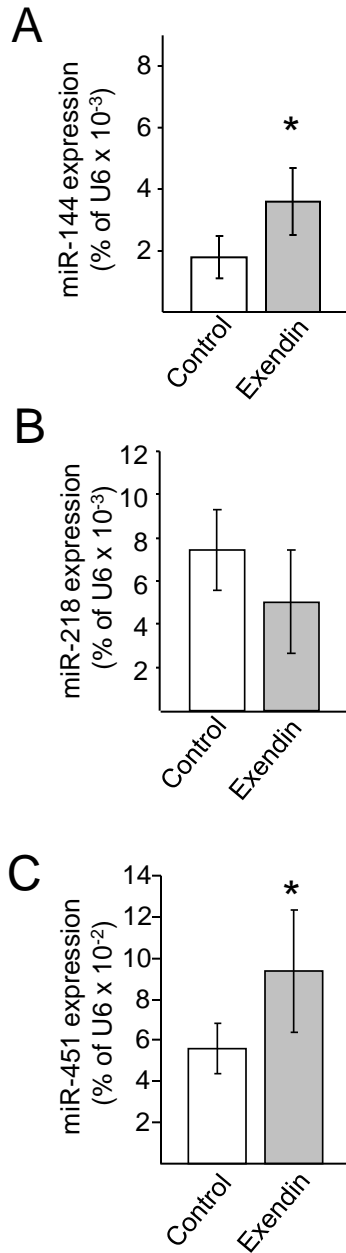

**Supplementary Fig.7) Impact of Exendin-4 on miRNAs expression in rat islets.**

Rat islets were treated with 100 nM Exendin-4 for 48h. miR-144 (A), miR-218 (B) and miR-451 (C) expression was measured by qRT-PCR. The data are expressed as % of U6 and correspond to the mean  $\pm$  SD of 4 independent experiments for miR-144 and miR-218 and of 6 independent experiments for miR-451. \* Significantly different from control condition ( $p < 0.05$  by ANOVA analysis).
